# Supplementary material
Source: PubMed Central journal article supplement (PMC2951422)
Supplement: 1012568107_pnas.201012568SI.pdf [file 1012568107_pnas.201012568SI.pdf]

# Supporting Information

Li et al. 10.1073/pnas.1012568107

## SI Methods

**Generation of APPs $\beta$  ki Mice.** A 17-kb mouse genomic clone containing exons 15–17 of the APP gene was isolated from a 129/SvJ mouse genomic library and subcloned into the NotI site of pBluescriptII KS (–) (Stratagene) to construct the targeting vector. AscI and MluI sites were inserted into the ClaI site of the vector. A 3-kb MluI fragment was removed from the plasmid to generate the starting vector with a 14-kb genomic sequence encompassing exons 15–17.

- (i) An ~5.5-kb HindIII fragment from the above genomic clone was subcloned into the HindIII site of the pBluescript vector.
- (ii) An SseI site was inserted into the intron region ~300 bp in front of exon 16 using primer sets (all from 5' to 3'):  
HL002: TAG GTA CAA TTT AA CCTGCAGG CTT AAC CAG CAT TGA TTT  
HL003: AAA TCA ATG CTG GTT AAG CCTGCAGG TT AAA TTG TAC CTA
- (iii) A DNA sequence from 250 bp upstream of exon 16 to 50 bp downstream of exon 16 was amplified from the genome vector by PCR using primer sets HL004 and HL005 and subcloned into the PstI site of the pBluescript vector with destroyed EcoRI and XhoI sites, HL004 carries SseI and loxP sequences; and HL005 carries MfeI and PstI sites.  
HL004: GC CCTGCAGG ATAACTTCGTATA GCATACAT TATACGAAGTTAT CTT AAC CAG CAT TGA TTT TTC C  
HL005: AA CTGCAG CAATTG CTC AGT TTT GAC ACA GGA CAA GC
- (iv) Human growth hormone (hGH) polyA terminator region was amplified from the pCMV5 vector using the primer HL006 to carry a sequence of exon 16 from the BglII site to the beta site of APP cleaving enzyme (BACE) cleavage site (sequence coding K670M671), stop codon, and 5' primer sequence from the hGH poly(A) region. Primer HL007 has the hGH poly(A) 3' antisense sequence plus the EcoRI site. The PCR product was subcloned into the BglII and EcoRI sites of exon 16 in the plasmid created in step 3. Next, a 2 $\times$  FLAG sequence was inserted into the XhoI site by annealing of primers HL008 and HL009.  
HL006: GA AG (ATC TCG GAA GTG AAG ATG) CTC GAG TAG CGG GTG GCA TCC CTG TGA CC  
HL007: CG GAATTC AAGGACAGGGAAGGGAG-CAG;  
HL008: TCGA C GAC TAC AAG GAT GAT GAC GAT AAG GAT TAC AAA GAC GAC GAT GAC AAG C  
HL009: TCGAG CTT GTC ATC GTC GTC TTT GTA ATC CTT ATC GTC ATC ATC CTT GTA GTC G
- (v) The PstI fragment of the plasmid generated in step 4 was subcloned into the SseI site of the plasmid from step 1.
- (vi) An EcoRI flanked double neocassette was subcloned into the MfeI site of the plasmid from step 5. The double neocassette was surrounded by the flippase recognition target (FRT) site and also contained the second loxP site for the targeting vector.
- (vii) The HindIII fragment from step 6 was used to replace the HindIII fragment in the starting vector.
- (viii) NotI flanked diphtheria toxin cassette was inserted into the NotI site of the targeting vector created in step 7.

The targeting vector was linearized by the AscI site and electroporated into embryonic R1 stem cells. Cell clones resistant to positive (300  $\mu$ g/mL G418) and negative selection were screened by Southern blot analysis using 5' and 3' outside probes to detect size shifts by BamHI digestion. The 5' probe was a 500-bp PCR product from a genomic clone using primers HL020: TCACC-CCCACTAAATGGCA and HL021: CCCTTTTGGTAAGCAT-TTG. To generate the 3' probe, a 3.4-kb KpnI/BamHI fragment from the genome clone containing the 8-kb region after exon 17 was subcloned into the pBluescript II KS vector. A 462-bp XhoI fragment from this construct, which resided 518 bp inside the 3' BamHI site, was used as the 3' probe for the Southern blot screen.

Three homologously recombined clones were injected into blastocysts of C57/BL6 mice to generate chimeric mice. Germline transmission was monitored by PCR using oligonucleotide primers HL033: GTAATGCCTGTGTGGCCAAACACATG and HL037: AAGTAATGGATTGTCTCCAGGTCG, which amplify the insertion site of the first loxP site. The expected PCR product from the WT allele is 230 bp in length, and the one from the ki allele would be 270 bp in length.

All analyses were performed in mice in which the neomycin resistance gene cassette was removed by flip recombination by crossing the initial mutant mice with flip transgenic mice.

**Plasmid Construct.** The mouse APPs $\beta$  sequence was PCR-amplified from the human full-length APP construct using primers AAGCTTATCACGATGCTGCCAGCTT and CCGCGGCAC-TTCCGAGATCTCTTCC and cloned into the pcDNA3.1/V5-His vector (Invitrogen) at the HindIII and SacII sites. Mouse full-length TTR and N-terminal 810-bp Klotho sequences were PCR-amplified from cDNAs reverse-transcribed from liver mRNA. The TTR-Luc reporter construct was subcloned by inserting 3 kb of TTR promoter (1) into pGL3-basic luciferase reporter vector (Promega).

**Cell Culture and Transfection.** CHO cells (Invitrogen; preadapted to serum-free medium) were maintained at 37 °C with 5% (vol/vol) CO<sub>2</sub> in DMEM with 10% (wt/vol) FBS and switched to serum-free medium (CD-CHO medium supplemented with 8 mM L-glutamine and 10 mL/L HT Supplement; all from Invitrogen) for recombinant protein production. CHO cells were transfected with pcDNA3.1-APPs $\beta$ -V5/His plasmid using Lipofectamine 2000 (Invitrogen) following instructions from the manufacturer. For stable transfection, 24 h after transfection, the culture medium was replaced with selection medium (DMEM with 10% (wt/vol) FBS, DMEM non-essential amino acid, and 1 mg/mL Geneticin; all from Invitrogen). The cells were cultured in selection medium for over 2 wk until single clones were visible, and the medium was changed every 3 d. Single-cell clones were picked, and APPs $\beta$ -V5/His secretion in conditioned serum-free medium was analyzed using SDS/PAGE with Coomassie blue staining (Simple Blue; Invitrogen). The clone with highest APPs $\beta$ -V5/His production was selected and expanded.

**Microarray Analysis.** Mice were euthanized at 2 mo of age, and hippocampi were dissected and frozen in liquid nitrogen immediately. Total RNA was isolated using an RNeasy Lipid Tissue Mini Kit (Qiagen). DNase treatment using an RNase-Free DNase Set (Qiagen) was included in the procedure to ensure that there was no DNA contamination. RNA samples were tested for quality assurance on an Agilent 2100

Bioanalyzer and quantitated on a Nanodrop Spectrophotometer (Thermo Scientific). For gene expression analysis, we used a Mouse Genome 430 2.0 Array from Affymetrix, which provides coverage of the transcribed mouse genome in a single array (over 39,000 transcripts). Scanning was done using an Affymetrix GeneChip Scanner 3000. Affymetrix labeling, hybridization, staining, washing, scanning, and statistical analysis were done by the Microarray Core at Baylor College of Medicine (<http://www.bcm.edu/mcfweb/>).

**Luciferase Reporter Assay.** Two to three  $\times 10^5$  HepG2 or Hep3B cells were seeded onto each well of a 12-well plate. An equal amount (1.6  $\mu$ g) of plasmid DNA was transfected using Lipofectamine 2000. The plasmids included pcDNA3.1-APPC99 (CTF), pcDNA3.1-Fe65 (2), pFRluc (Stratagene), pRL-TK (Promega), and TTR-Luc described as above. The cells were lysed 48 h after transfection. Luciferase activities were determined using a dual-luciferase reporter system (Promega) and normalized with Renilla luciferase activity.

1. Liao L, et al. (2006) Liver-specific overexpression of the insulin-like growth factor-1 enhances somatic growth and partially prevents the effects of growth hormone deficiency. *Endocrinology* 147:3877–3888.

2. Cao X, Sudhof TC (2001) A transcriptionally active complex of APP with Fe65 and histone acetyltransferase Tip60. *Science* 293:115–120.

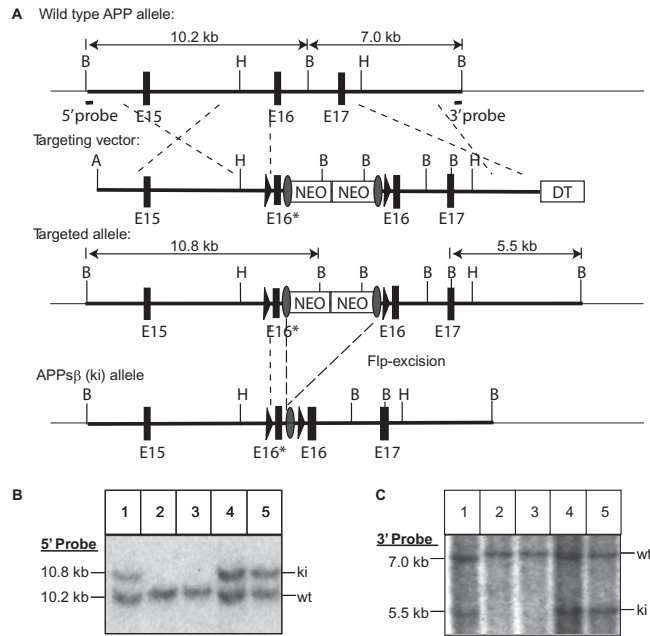

**Fig. S1.** Schemes used to generate APPs $\beta$  (ki) mice and Southern blot analysis. (A) Schematic representation of generation of the APPs $\beta$  ki allele (detailed description provided in *S1 Text*). Exon 16 (E16), which encodes the BACE cleavage site, was truncated at the sequence coding K670M671, followed by the FLAG sequence and stop codon. The mutated exon 16 was marked as E16\*. Restriction sites marked are as follows: A, AsclI; B, BamHI; H: Hind III. The black arrowhead represents loxP, and the filled gray oval represents FRT. NEO, neoresistant cassette; DT, diphtheria toxin cassette. (B) Southern blot by 5' probe showing the BamHI fragment from the WT allele at 10.2 kb, whereas the fragment from the ki allele is at 10.8 kb. (C) Southern blot by 3' probe. The WT allele gave a BamHI fragment at 7 kb, and the mutant allele gave a BamHI fragment at 5.5 kb. Lanes 1 and 2 were DNA from ES cell clones, and lanes 3–5 were DNA from mouse tails.



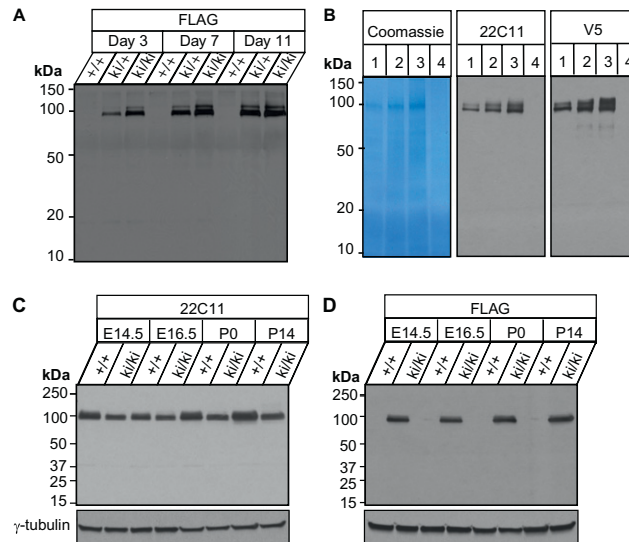

**Fig. 54.** Analysis of APP expression and secretion. (A) Western blot analysis of APPs $\beta$  secreted to CM at 3, 7, and 11 DIV using the anti-FLAG antibody, which detected only intact APPs $\beta$  with no visible degradation/cleavage products. (B) Coomassie blue staining and Western blot analysis of APPs $\beta$  expressed in the CM of CHO transfected with APPs $\beta$ -V5 using 22C11 and anti-V5 antibodies. Lanes 1–3 were CM collected 24, 72, and 120 h after transfection, respectively. Lane 4 was CM from untransfected control wells collected at 120 h. Coomassie blue staining showed that the APPs $\beta$  protein can be visualized without immunostaining, which accumulated overtime. Immunoblotting using the 22C11 and anti-V5 antibodies, which recognized the amino- and carboxyl-sequences of APP, respectively, demonstrated time-dependent accumulation of intact APPs $\beta$  and no detection of cleavage products. Western blot analysis of APP was expressed in E14.5, E16.5, P0, and P14 brains using the 22C11 (C) and anti-FLAG (D) antibodies. The  $\gamma$ -tubulin blot was used as a protein loading control.

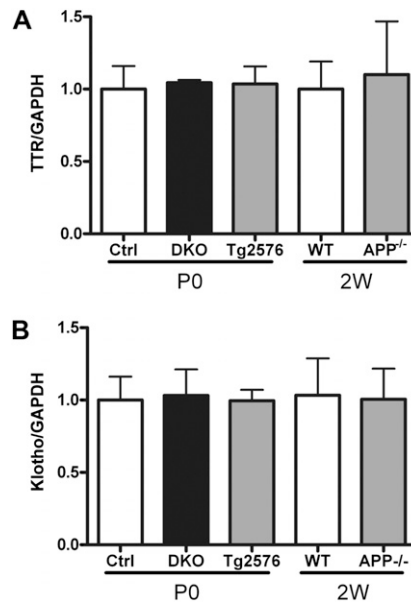

**Fig. 55.** qRT-PCR analysis of *TTR* (A) and *Klotho* (B) mRNA levels, normalized to the GAPDH standard, from whole brains of P0 APLP2<sup>-/-</sup> control (Ctrl), APP/APLP2 dKO, or Tg2576 mice as well as hippocampi of WT and APP<sup>-/-</sup> mice at 2 wk of age (2W) ( $n = 3$  per genotype per age). No differences were detected among different genotypes and at both ages.

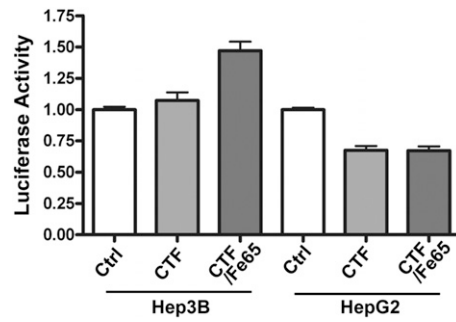

**Fig. S6.** Lack of response of TTR promoter to APP-CTF/Fe65. Hep3B and HepG2 cells were transfected with empty pcDNA3.1 (Ctrl), pcDNA3.1-APPC99 (CTF), or CTF with pcDNA3.1-Fe65 (CTF/Fe65), together with a TTR promoter-luciferase reporter construct (TTR-Luc) and pRL-TK. Results are expressed as normalized luciferase activity. Data are the mean  $\pm$  SEM of three independent experiments.

**Table S1. Differentially regulated genes in the hippocampus of neuronal APP/APLP2 N-dCKO mice**

| Probe ID     | Entrez ID | Gene symbol    | Description                                                                | Fold change | P value | Gene ontology (GO) biological process                                                |
|--------------|-----------|----------------|----------------------------------------------------------------------------|-------------|---------|--------------------------------------------------------------------------------------|
| 1420621_a_at | 11820     | <i>App</i>     | Amyloid- $\beta$ (A4) precursor protein                                    | -28.690     | 0.000   |                                                                                      |
| 1451580_a_at | 22139     | <i>Ttr</i>     | Transthyretin                                                              | -5.210      | 0.018   | Thyroid hormone binding and transport                                                |
| 1448556_at   | 19116     | <i>Prlr</i>    | Prolactin receptor                                                         | -4.904      | 0.002   | Receptor activity                                                                    |
| 1418808_at   | 19682     | <i>Rdh5</i>    | Retinol dehydrogenase 5                                                    | -4.119      | 0.026   | Catalytic activity                                                                   |
| 1430648_at   | 72821     | <i>Scn2b</i>   | Sodium channel, voltage-gated, type II, $\beta$                            | -2.950      | 0.004   | Voltage-gated ion channel activity                                                   |
| 1434667_at   | 329941    | <i>Col8a2</i>  | Collagen, type VIII, $\alpha$ 2                                            | -2.673      | 0.004   | Cell adhesion                                                                        |
| 1424893_at   | 83431     | <i>Ndel1</i>   | Nuclear distribution gene E-like homolog 1 ( <i>Aspergillus nidulans</i> ) | -2.557      | 0.009   | Microtubule cytoskeleton organization, neuron migration, axon genesis                |
| 1454866_s_at | 209195    | <i>Clic6</i>   | Chloride intracellular channel 6                                           | -2.362      | 0.007   | Chloride transport                                                                   |
| 1448766_at   | 14618     | <i>Gjb1</i>    | Gap junction membrane channel protein $\beta$ 1                            | -2.054      | 0.012   | Cell communication, gap junction channel activity                                    |
| 1450995_at   | 14275     | <i>Folr1</i>   | Folate receptor 1 (adult)                                                  | -1.670      | 0.007   | Folic acid metabolic process                                                         |
| 1448136_at   | 18606     | <i>Enpp2</i>   | Ectonucleotide pyrophosphatase/phosphodiesterase 2                         | -1.651      | 0.004   | Chemotaxis, immune response, lipid catabolic process                                 |
| 1456418_at   | 100040591 | <i>Kcnj13</i>  | Potassium inwardly rectifying channel, subfamily J, member 13              | -1.618      | 0.007   | Potassium ion transport                                                              |
| 1448754_at   |           | <i>Rbp1</i>    | Retinol-binding protein 1                                                  | -1.552      | 0.036   | Retinol binding and transport                                                        |
| 1449421_a_at | 246133    | <i>Kcne2</i>   | Potassium voltage-gated channel, Isk-related subfamily, gene 2             | -1.506      | 0.005   | Potassium ion transport                                                              |
| 1425926_a_at | 18424     | <i>Otx2</i>    | Orthodenticle homolog 2 ( <i>Drosophila</i> )                              | -1.261      | 0.003   | Central nervous system development, organ morphogenesis                              |
| 1423400_at   | 16591     | <i>Kl</i>      | Klotho                                                                     | -1.238      | 0.003   | Acute inflammatory response.; energy reserve metabolic process, aging                |
| 1452546_x_at | 246081    | <i>Defb11</i>  | Defensin $\beta$ 11                                                        | -1.196      | 0.003   | Defense response to bacterium                                                        |
| 1424713_at   | 75600     | <i>Calml4</i>  | Calmodulin-like 4                                                          | -1.170      | 0.005   | Calcium ion binding                                                                  |
| 1416203_at   | 11826     | <i>Aqp1</i>    | Aquaporin 1                                                                | -1.122      | 0.003   | Water transport, carbon dioxide transport, ammonium transport                        |
| 1449340_at   | 66042     | <i>Sostdc1</i> | Sclerostin domain containing 1                                             | -1.112      | 0.004   | Pattern specification process, Wnt receptor and bone morphogenetic protein signaling |
| 1417231_at   | 12738     | <i>Cldn2</i>   | Claudin 2                                                                  | -1.105      | 0.002   | Calcium-independent cell-cell adhesion                                               |
| 1443723_at   | 226025    | <i>Trpm3</i>   | Transient receptor potential cation channel, subfamily M, member 3         | -1.105      | 0.002   | Ion transport                                                                        |
| 1438200_at   | 240725    | <i>Sulf1</i>   | Sulfatase 1                                                                | -1.036      | 0.004   | Sulfur metabolic process, apoptosis                                                  |
| 1418907_at   | 14067     | <i>F5</i>      | Coagulation factor V                                                       | -0.965      | 0.003   | Cell adhesion, blood coagulation                                                     |
| 1455627_at   | 12837     | <i>Col8a1</i>  | Collagen, type VIII, $\alpha$ 1                                            | -0.960      | 0.004   | Cell adhesion                                                                        |
| 1448550_at   | 16803     | <i>Lbp</i>     | Lipopolysaccharide-binding protein                                         | -0.928      | 0.002   | Acute-phase response, innate immune response                                         |
| 1440902_at   | 77767     | <i>Ernm</i>    | Ermin, ERM-like protein                                                    | -0.921      | 0.012   | Actin filament organization                                                          |
| 1417275_at   | 17153     | <i>Mal</i>     | Myelin and lymphocyte protein, T-cell differentiation protein              | -0.842      | 0.026   | Myelination, induction of apoptosis                                                  |
| 1451532_s_at | 70358     | <i>Steap1</i>  | Six-transmembrane epithelial antigen of the prostate 1                     | -0.837      | 0.004   | Iron ion transport, electron transport chain, oxidation reduction                    |
| 1452975_at   | 71760     | <i>Agxt2l1</i> | Alanine-glyoxylate aminotransferase 2-like 1                               | -0.800      | 0.008   | Catalytic activity                                                                   |
| 1421955_a_at | 17999     | <i>Nedd4</i>   | Neural precursor cell expressed, developmentally down-regulated 4          | 0.820       | 0.002   | Protein ubiquitination                                                               |
| 1457936_at   | 26419     | <i>Mapk8</i>   | Mitogen-activated protein kinase 8                                         | 1.073       | 0.027   | JNK cascade, ju-nana (JUN) phosphorylation, apoptosis                                |

Results of mean fold change of four pairs of littermate *APLP2* null control vs. N-dCKO are expressed as  $\log_2$ . The biological processes associated with each gene are derived from the GO annotations provided in the array annotation file from Affymetrix.
